# Supplementary material for: Effects of a combination of plant bioactive lipid compounds and biotin compared with monensin on body condition, energy metabolism and milk performance in transition dairy cows
Source: PubMed Central journal article supplement (PMC5870966; doi:10.1371/journal.pone.0193685), 2018-03-27
Supplement: pone.0193685.s001.pdf [file pone.0193685.s001.pdf]

**S1 Table. Postpartum concentrate intake, milk robot visits and milk yield of cows receiving plant bioactive lipid compounds and biotin (PBLC+B) from d -21 to d 37 relative to parturition, cows receiving a monensin bolus (MON) at d -21 or cows receiving no such supplements (CON)**

| Day | Concentrate <sup>1</sup> intake, kg/d |        |      |       |                 | Milk robot visits per day |        |     |      |                 | Milk yield, kg/d |        |      |      |                 |
|-----|---------------------------------------|--------|------|-------|-----------------|---------------------------|--------|-----|------|-----------------|------------------|--------|------|------|-----------------|
|     | CON                                   | PBLC+B | MON  | SEM   | <i>P</i> -value | CON                       | PBLC+B | MON | SEM  | <i>P</i> -value | CON              | PBLC+B | MON  | SEM  | <i>P</i> -value |
| 2   | 2.44                                  | 2.21   | 2.32 | 0.128 | 0.28            | 2.0                       | 1.9    | 2.2 | 0.13 | 0.33            | 18.3             | 17.2   | 18.8 | 1.60 | 0.45            |
| 5   | 2.85                                  | 2.75   | 2.54 | 0.120 | 0.19            | 2.4                       | 2.1    | 2.4 | 0.15 | 0.42            | 29.5             | 29.5   | 28.7 | 1.49 | 0.75            |
| 8   | 3.41                                  | 3.28   | 3.15 | 0.164 | 0.076           | 2.9                       | 2.4    | 2.7 | 0.23 | 0.12            | 33.8             | 33.2   | 32.6 | 1.51 | 0.80            |
| 11  | 3.96                                  | 3.92   | 3.77 | 0.212 | 0.74            | 2.9                       | 2.8    | 3.0 | 0.25 | 0.84            | 35.0             | 35.6   | 35.7 | 1.81 | 0.76            |
| 14  | 4.70                                  | 4.53   | 4.34 | 0.227 | 0.51            | 3.0                       | 2.9    | 3.3 | 0.29 | 0.25            | 36.5             | 37.6   | 38.3 | 1.77 | 0.84            |
| 17  | 5.35                                  | 5.21   | 4.84 | 0.239 | 0.35            | 3.2                       | 2.9    | 3.4 | 0.29 | 0.13            | 38.1             | 39.3   | 40.2 | 1.95 | 0.70            |
| 20  | 5.97                                  | 5.79   | 5.43 | 0.296 | 0.44            | 3.1                       | 3.1    | 3.2 | 0.28 | 0.83            | 39.6             | 40.6   | 42.4 | 1.96 | 0.38            |
| 23  | 6.46                                  | 6.23   | 5.96 | 0.374 | 0.62            | 3.0                       | 3.1    | 3.4 | 0.29 | 0.45            | 40.9             | 42.6   | 43.5 | 2.02 | 0.60            |
| 26  | 6.35                                  | 6.49   | 6.42 | 0.463 | 0.97            | 2.9                       | 3.0    | 3.3 | 0.29 | 0.29            | 41.5             | 42.5   | 45.2 | 2.02 | 0.43            |
| 29  | 6.29                                  | 6.75   | 6.51 | 0.469 | 0.73            | 2.9                       | 3.3    | 3.3 | 0.30 | 0.42            | 41.6             | 44.0   | 45.8 | 2.04 | 0.27            |
| 32  | 6.66                                  | 6.53   | 6.59 | 0.447 | 0.97            | 3.1                       | 3.2    | 3.3 | 0.32 | 0.88            | 42.3             | 44.9   | 46.0 | 2.35 | 0.34            |
| 35  | 6.77                                  | 6.54   | 6.55 | 0.463 | 0.90            | 3.2                       | 3.1    | 3.3 | 0.29 | 0.83            | 44.1             | 44.7   | 45.9 | 2.26 | 0.81            |
| 38  | 6.95                                  | 6.52   | 6.63 | 0.451 | 0.72            | 3.3                       | 3.3    | 3.3 | 0.25 | 0.97            | 44.9             | 45.1   | 47.3 | 1.99 | 0.54            |
| 41  | 6.90                                  | 6.53   | 6.70 | 0.481 | 0.80            | 3.4                       | 3.3    | 3.4 | 0.24 | 0.74            | 44.9             | 44.7   | 47.3 | 1.89 | 0.47            |
| 44  | 7.10                                  | 6.64   | 6.76 | 0.449 | 0.63            | 3.3                       | 3.3    | 3.4 | 0.29 | 0.88            | 44.4             | 45.5   | 47.0 | 1.84 | 0.53            |
| 47  | 6.79                                  | 6.78   | 7.12 | 0.465 | 0.68            | 3.3                       | 3.4    | 3.4 | 0.29 | 0.77            | 43.5             | 45.6   | 47.8 | 2.07 | 0.18            |
| 50  | 6.94                                  | 6.88   | 7.31 | 0.436 | 0.49            | 3.2                       | 3.4    | 3.3 | 0.30 | 0.89            | 43.9             | 45.3   | 47.7 | 2.15 | 0.37            |
| 53  | 6.80                                  | 6.71   | 7.36 | 0.468 | 0.22            | 3.2                       | 3.3    | 3.4 | 0.31 | 0.75            | 42.9             | 45.5   | 46.9 | 2.31 | 0.32            |
| 56  | 6.86                                  | 7.03   | 7.46 | 0.385 | 0.19            | 3.2                       | 3.4    | 3.4 | 0.32 | 0.55            | 43.1             | 44.9   | 47.9 | 2.21 | 0.12            |

Data were pooled per cow over 3 consecutive days and are presented as means and pooled SEM of 17 cows in the CON group, 18 cows in the PBLC+B group and 18 cows in the MON group.

<sup>1</sup>Concentrates included a fixed allowance of 1 kg/d concentrate C1 (groups CON and MON) or C1\*PBLC+B (group PBLC+B; for composition, see Table 1), which was delivered first at the first daily milking. The rest of the total concentrate allowance consisted of equal parts of C1 and C2.
