# Supplementary material for: Effects of a combination of plant bioactive lipid compounds and biotin compared with monensin on body condition, energy metabolism and milk performance in transition dairy cows
Source: PubMed Central journal article supplement (PMC5870966; doi:10.1371/journal.pone.0193685), 2018-03-27
Supplement: pone.0193685.s002.pdf [file pone.0193685.s002.pdf]

**S2 Table. Back fat thickness, body condition score and body weight of cows receiving plant bioactive lipid compounds and biotin (PBLC+B) from d -21 to 37 relative to parturition, cows receiving a monensin bolus (MON) at d -21 or cows receiving no such supplements (CON)**

| Day | Back fat thickness, cm |        |      |       |                 | Body condition score |                   |                    |       |                 | Body weight, kg  |                  |                   |      |                 |
|-----|------------------------|--------|------|-------|-----------------|----------------------|-------------------|--------------------|-------|-----------------|------------------|------------------|-------------------|------|-----------------|
|     | CON                    | PBLC+B | MON  | SEM   | <i>P</i> -value | CON                  | PBLC+B            | MON                | SEM   | <i>P</i> -value | CON              | PBLC+B           | MON               | SEM  | <i>P</i> -value |
| -21 | 2.86                   | 3.29   | 3.11 | 0.355 | 0.24            | 3.57                 | 3.82              | 3.71               | 0.236 | 0.47            |                  |                  |                   |      |                 |
| -7  | 2.67                   | 3.29   | 3.00 | 0.358 | 0.45            | 3.51                 | 3.67              | 3.50               | 0.222 | 0.21            |                  |                  |                   |      |                 |
| 2   | 2.52                   | 3.15   | 2.74 | 0.340 | 0.39            | 3.29                 | 3.49              | 3.42               | 0.223 | 0.13            | 703              | 746              | 739               | 34.5 | 0.38            |
| 9   | 2.26                   | 2.89   | 2.57 | 0.321 | 0.19            | 3.09                 | 3.33              | 3.19               | 0.210 | 0.102           | 672              | 729              | 712               | 32.5 | 0.19            |
| 16  | 1.99                   | 2.57   | 2.21 | 0.304 | 0.29            | 2.90                 | 3.11              | 2.99               | 0.206 | 0.093           | 651 <sup>b</sup> | 731 <sup>a</sup> | 698 <sup>ab</sup> | 28.0 | 0.025           |
| 23  | 1.70                   | 2.27   | 1.96 | 0.294 | 0.25            | 2.78                 | 3.00              | 2.86               | 0.198 | 0.080           | 657              | 723              | 698               | 28.4 | 0.072           |
| 30  | 1.54                   | 2.03   | 1.85 | 0.265 | 0.45            | 2.69                 | 2.86              | 2.81               | 0.198 | 0.16            | 653 <sup>b</sup> | 730 <sup>a</sup> | 694 <sup>ab</sup> | 29.1 | 0.036           |
| 37  | 1.40                   | 1.93   | 1.66 | 0.261 | 0.15            | 2.56                 | 2.79              | 2.69               | 0.149 | 0.12            | 646 <sup>b</sup> | 731 <sup>a</sup> | 692 <sup>ab</sup> | 29.4 | 0.020           |
| 44  | 1.26                   | 1.77   | 1.55 | 0.249 | 0.30            | 2.51 <sup>b</sup>    | 2.69 <sup>a</sup> | 2.64 <sup>ab</sup> | 0.186 | 0.030           | 649 <sup>b</sup> | 732 <sup>a</sup> | 688 <sup>ab</sup> | 27.9 | 0.007           |
| 51  | 1.18                   | 1.64   | 1.49 | 0.249 | 0.25            | 2.47                 | 2.67              | 2.61               | 0.187 | 0.065           | 656 <sup>b</sup> | 748 <sup>a</sup> | 712 <sup>ab</sup> | 28.7 | 0.008           |
| 58  | 1.09                   | 1.53   | 1.44 | 0.242 | 0.12            | 2.37                 | 2.61              | 2.57               | 0.199 | 0.061           | 656 <sup>b</sup> | 747 <sup>a</sup> | 714 <sup>b</sup>  | 28.1 | 0.005           |

Data are means and pooled SEM of 17 cows in the CON group, 18 cows in the PBLC+B group and 18 cows in the MON group. Body weight data were pooled over three consecutive days per animal before statistical analysis.

<sup>ab</sup>Superscript letters indicate differences among treatment groups at  $P < 0.05$ .
