# Supplementary material for: Effects of a combination of plant bioactive lipid compounds and biotin compared with monensin on body condition, energy metabolism and milk performance in transition dairy cows
Source: PubMed Central journal article supplement (PMC5870966; doi:10.1371/journal.pone.0193685), 2018-03-27
Supplement: pone.0193685.s003.pdf [file pone.0193685.s003.pdf]

**S3 Table. Serum concentrations of key indicators of energy metabolism in cows receiving plant bioactive lipid compounds and biotin (PBLC+B) from d -21 to 37 relative to parturition, cows receiving a monensin bolus (MON) at d -21 or cows receiving no such supplements (CON)**

| Day | Glucose, mmol/L |        |      |       |                 | BHB, mmol/L       |                    |                   |       |                 | NEFA, mmol/L |        |      |       |                 | Triglycerides, mmol/L |                   |                    |       |                 |
|-----|-----------------|--------|------|-------|-----------------|-------------------|--------------------|-------------------|-------|-----------------|--------------|--------|------|-------|-----------------|-----------------------|-------------------|--------------------|-------|-----------------|
|     | CON             | PBLC+B | MON  | SEM   | <i>P</i> -value | CON               | PBLC+B             | MON               | SEM   | <i>P</i> -value | CON          | PBLC+B | MON  | SEM   | <i>P</i> -value | CON                   | PBLC+B            | MON                | SEM   | <i>P</i> -value |
| -21 | 3.80            | 3.73   | 3.79 | 0.080 | 0.59            | 0.80              | 0.83               | 0.77              | 0.069 | 0.63            | 0.09         | 0.10   | 0.11 | 0.019 | 0.54            | 0.29                  | 0.33              | 0.29               | 0.021 | 0.19            |
| -7  | 3.61            | 3.57   | 3.66 | 0.112 | 0.90            | 0.73 <sup>a</sup> | 0.81 <sup>a</sup>  | 0.59 <sup>b</sup> | 0.063 | 0.001           | 0.20         | 0.22   | 0.28 | 0.052 | 0.49            | 0.30                  | 0.30              | 0.27               | 0.027 | 0.60            |
| 2   | 3.66            | 3.41   | 4.01 | 0.259 | 0.17            | 0.88              | 0.98               | 0.82              | 0.121 | 0.085           | 0.62         | 0.53   | 0.65 | 0.110 | 0.73            | 0.14                  | 0.14              | 0.14               | 0.009 | 0.58            |
| 9   | 2.86            | 2.74   | 3.16 | 0.142 | 0.070           | 1.31 <sup>a</sup> | 1.38 <sup>a</sup>  | 1.13 <sup>a</sup> | 0.220 | 0.043           | 0.55         | 0.44   | 0.51 | 0.072 | 0.49            | 0.12                  | 0.13              | 0.13               | 0.008 | 0.80            |
| 16  | 2.69            | 2.89   | 2.87 | 0.141 | 0.26            | 1.87 <sup>a</sup> | 1.51 <sup>ab</sup> | 1.08 <sup>b</sup> | 0.293 | 0.009           | 0.47         | 0.34   | 0.38 | 0.103 | 0.64            | 0.13                  | 0.13              | 0.12               | 0.010 | 0.61            |
| 23  | 2.80            | 2.81   | 2.84 | 0.173 | 0.97            | 1.69              | 1.46               | 1.35              | 0.308 | 0.49            | 0.36         | 0.34   | 0.29 | 0.080 | 0.44            | 0.13                  | 0.14              | 0.12               | 0.010 | 0.066           |
| 30  | 2.91            | 2.85   | 3.10 | 0.172 | 0.26            | 1.82              | 1.71               | 1.37              | 0.400 | 0.63            | 0.27         | 0.24   | 0.24 | 0.049 | 0.80            | 0.14                  | 0.14              | 0.13               | 0.011 | 0.65            |
| 37  | 2.84            | 2.96   | 3.05 | 0.128 | 0.24            | 1.58              | 1.47               | 1.14              | 0.262 | 0.18            | 0.21         | 0.24   | 0.24 | 0.048 | 0.58            | 0.13 <sup>b</sup>     | 0.16 <sup>a</sup> | 0.15 <sup>ab</sup> | 0.011 | 0.036           |
| 44  | 2.89            | 3.16   | 3.10 | 0.152 | 0.080           | 1.61              | 1.33               | 1.10              | 0.328 | 0.18            | 0.18         | 0.21   | 0.20 | 0.046 | 0.95            | 0.15                  | 0.17              | 0.16               | 0.014 | 0.44            |
| 51  | 3.03            | 3.16   | 3.15 | 0.141 | 0.80            | 1.52              | 1.25               | 1.21              | 0.386 | 0.97            | 0.18         | 0.20   | 0.15 | 0.037 | 0.38            | 0.15                  | 0.17              | 0.17               | 0.012 | 0.17            |
| 58  | 3.10            | 3.13   | 3.07 | 0.133 | 0.94            | 1.39              | 1.18               | 1.11              | 0.304 | 0.95            | 0.14         | 0.16   | 0.15 | 0.020 | 0.93            | 0.15                  | 0.17              | 0.16               | 0.011 | 0.24            |

Data are means and pooled SEM of 17 cows in the CON group, 18 cows in the PBLC+B group and 18 cows in the MON group.

<sup>ab</sup>Superscript letters indicate differences among treatment groups at  $P < 0.05$ .
