# Supplementary material for: Effects of a combination of plant bioactive lipid compounds and biotin compared with monensin on body condition, energy metabolism and milk performance in transition dairy cows
Source: PubMed Central journal article supplement (PMC5870966; doi:10.1371/journal.pone.0193685), 2018-03-27
Supplement: pone.0193685.s004.pdf [file pone.0193685.s004.pdf]

**S4 Table. Serum concentrations of indicators of liver function in cows receiving plant bioactive lipid compounds and biotin (PBLC+B) from d -21 to 37 relative to parturition, cows receiving a monensin bolus (MON) at d -21 or cows receiving no such supplements (CON)**

| Day | Cholesterol, mmol/L |        |      |       |                 | Bilirubin, $\mu$ mol/L |        |      |       |                 | Urea, mmol/L |        |      |       |                 |
|-----|---------------------|--------|------|-------|-----------------|------------------------|--------|------|-------|-----------------|--------------|--------|------|-------|-----------------|
|     | CON                 | PBLC+B | MON  | SEM   | <i>P</i> -value | CON                    | PBLC+B | MON  | SEM   | <i>P</i> -value | CON          | PBLC+B | MON  | SEM   | <i>P</i> -value |
| -21 | 2.85                | 2.84   | 2.84 | 0.268 | 1.00            | 0.64                   | 0.61   | 0.63 | 0.167 | 0.66            | 4.37         | 4.31   | 4.36 | 0.261 | 0.97            |
| -7  | 2.05                | 2.02   | 2.05 | 0.170 | 0.98            | 1.39                   | 1.33   | 1.65 | 0.468 | 0.78            | 3.94         | 4.32   | 4.32 | 0.259 | 0.23            |
| 2   | 1.65                | 1.61   | 1.73 | 0.144 | 0.74            | 5.05                   | 3.91   | 5.94 | 1.206 | 0.74            | 4.35         | 4.53   | 4.89 | 0.378 | 0.77            |
| 9   | 2.19                | 2.10   | 2.05 | 0.199 | 0.75            | 3.24                   | 2.79   | 3.51 | 0.783 | 0.94            | 4.14         | 3.92   | 4.43 | 0.268 | 0.27            |
| 16  | 2.70                | 2.80   | 2.63 | 0.244 | 0.76            | 2.62                   | 1.68   | 2.06 | 0.644 | 0.75            | 4.28         | 3.86   | 4.62 | 0.305 | 0.054           |
| 23  | 3.24                | 3.51   | 3.33 | 0.288 | 0.60            | 1.37                   | 1.24   | 1.30 | 0.351 | 1.00            | 4.48         | 4.48   | 4.92 | 0.341 | 0.33            |
| 30  | 3.71                | 3.92   | 3.99 | 0.299 | 0.59            | 1.08                   | 0.84   | 0.83 | 0.281 | 0.63            | 4.63         | 4.39   | 4.93 | 0.303 | 0.21            |
| 37  | 4.02                | 4.35   | 4.44 | 0.334 | 0.41            | 0.81                   | 0.83   | 0.84 | 0.240 | 0.83            | 5.20         | 4.72   | 5.12 | 0.300 | 0.24            |
| 44  | 4.40                | 4.71   | 4.85 | 0.346 | 0.41            | 0.56                   | 0.90   | 0.81 | 0.235 | 0.57            | 4.94         | 4.91   | 5.15 | 0.239 | 0.76            |
| 51  | 4.64                | 4.93   | 5.05 | 0.356 | 0.46            | 0.67                   | 0.77   | 0.50 | 0.187 | 0.43            | 5.18         | 4.94   | 5.38 | 0.308 | 0.37            |
| 58  | 4.80                | 4.96   | 5.09 | 0.380 | 0.74            | 0.51                   | 0.53   | 0.50 | 0.120 | 0.95            | 5.48         | 4.95   | 5.58 | 0.271 | 0.063           |

Data are means and pooled SEM of 17 cows in the CON group, 18 cows in the PBLC+B group and 18 cows in the MON group.
