# Supplementary material for: Effects of a combination of plant bioactive lipid compounds and biotin compared with monensin on body condition, energy metabolism and milk performance in transition dairy cows
Source: PubMed Central journal article supplement (PMC5870966; doi:10.1371/journal.pone.0193685), 2018-03-27
Supplement: pone.0193685.s005.pdf [file pone.0193685.s005.pdf]

**S5 Table. Serum activities of enzymes in cows receiving plant bioactive lipid compounds and biotin (PBLC+B) from d -21 to 37 relative to parturition, cows receiving a monensin bolus (MON) at d -21 or cows receiving no such supplements (CON)**

| Day | Aspartate transaminase, U/L |        |       |       |                 | $\gamma$ -Glutamyltranspeptidase, U/L |        |      |      |                 | Glutamate dehydrogenase, U/L |        |      |       |                 |
|-----|-----------------------------|--------|-------|-------|-----------------|---------------------------------------|--------|------|------|-----------------|------------------------------|--------|------|-------|-----------------|
|     | CON                         | PBLC+B | MON   | SEM   | <i>P</i> -value | CON                                   | PBLC+B | MON  | SEM  | <i>P</i> -value | CON                          | PBLC+B | MON  | SEM   | <i>P</i> -value |
| -21 | 70.5                        | 70.7   | 77.6  | 6.01  | 0.82            | 25.1                                  | 26.2   | 27.5 | 2.24 | 0.61            | 13.8                         | 14.1   | 13.7 | 4.04  | 0.73            |
| -7  | 66.5                        | 64.4   | 82.4  | 4.91  | 0.17            | 22.4                                  | 23.5   | 24.5 | 1.75 | 0.62            | 11.0                         | 9.9    | 15.4 | 2.39  | 0.23            |
| 2   | 96.5                        | 94.4   | 107.6 | 9.96  | 0.49            | 22.1                                  | 21.8   | 24.4 | 1.54 | 0.96            | 9.2                          | 7.3    | 10.6 | 1.67  | 0.36            |
| 9   | 109.6                       | 104.2  | 126.6 | 13.66 | 0.40            | 24.6                                  | 23.6   | 26.4 | 1.54 | 0.30            | 13.6                         | 14.4   | 17.3 | 4.45  | 0.14            |
| 16  | 103.5                       | 95.0   | 109.0 | 8.90  | 0.60            | 26.8                                  | 26.9   | 30.6 | 2.37 | 0.14            | 24.9                         | 20.5   | 32.9 | 8.18  | 0.14            |
| 23  | 91.4                        | 84.5   | 94.6  | 6.77  | 0.64            | 29.6                                  | 29.8   | 35.5 | 3.05 | 0.26            | 26.1                         | 23.3   | 38.4 | 9.48  | 0.46            |
| 30  | 91.3                        | 74.4   | 87.3  | 7.43  | 0.13            | 35.7                                  | 30.2   | 40.9 | 6.03 | 0.50            | 31.7                         | 19.8   | 42.0 | 11.77 | 0.34            |
| 37  | 82.3                        | 73.2   | 112.8 | 5.25  | 0.68            | 31.8                                  | 30.4   | 39.9 | 3.50 | 0.36            | 21.4                         | 21.9   | 28.8 | 9.62  | 0.71            |
| 44  | 78.4                        | 71.3   | 83.8  | 5.00  | 0.69            | 31.1                                  | 30.5   | 38.1 | 2.67 | 0.25            | 19.0                         | 18.8   | 19.6 | 7.34  | 0.71            |
| 51  | 79.0                        | 71.1   | 79.1  | 6.01  | 0.40            | 30.3                                  | 30.5   | 35.7 | 2.26 | 0.32            | 17.0                         | 15.3   | 21.1 | 4.17  | 0.56            |
| 58  | 84.3                        | 68.8   | 80.9  | 6.83  | 0.096           | 29.8                                  | 29.5   | 33.9 | 1.81 | 0.37            | 22.0                         | 13.6   | 16.2 | 5.21  | 0.44            |

Data are means and pooled SEM of 17 cows in the CON group, 18 cows in the PBLC+B group and 18 cows in the MON group.
