# Supplementary material for: Effects of a combination of plant bioactive lipid compounds and biotin compared with monensin on body condition, energy metabolism and milk performance in transition dairy cows
Source: PubMed Central journal article supplement (PMC5870966; doi:10.1371/journal.pone.0193685), 2018-03-27
Supplement: pone.0193685.s007.pdf [file pone.0193685.s007.pdf]

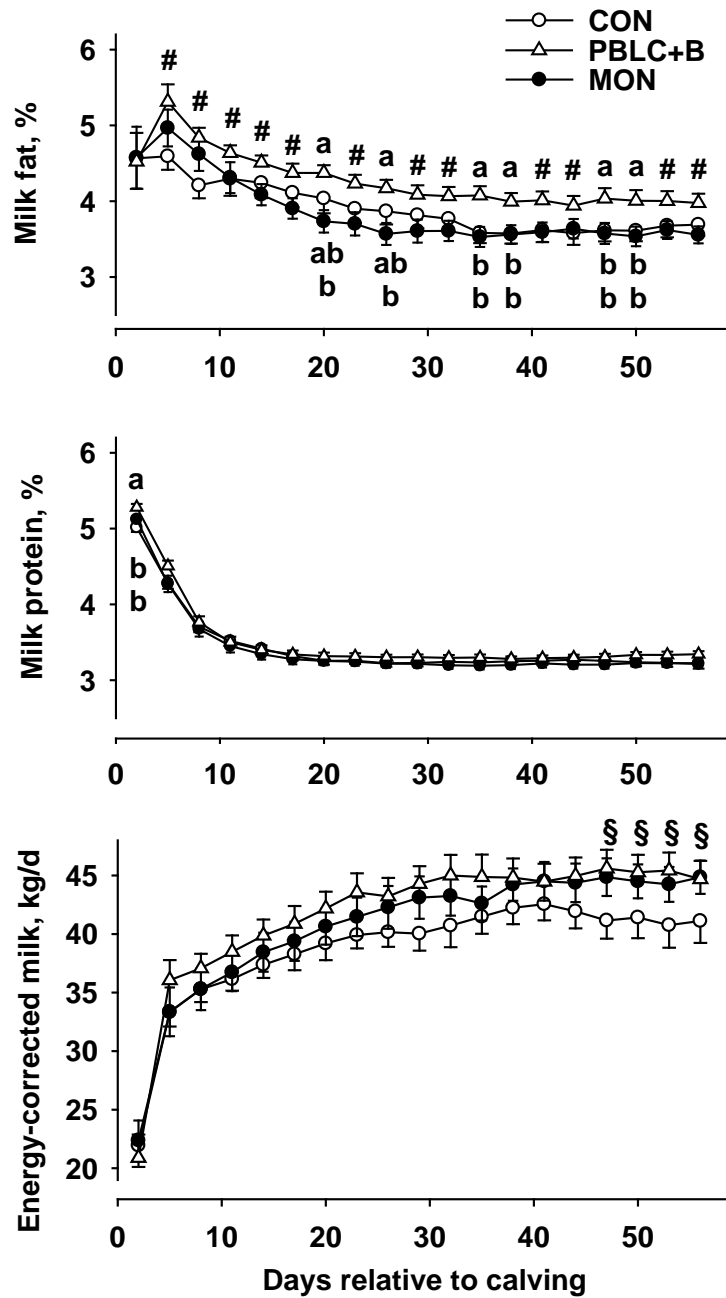

**S2 Figure. Milk fat and protein percentages and energy-corrected milk yield (ECM) derived from daily measurements of the milking robot.** Cows were supplemented with 2 g/d plant bioactive lipid compounds and 40 mg/d biotin (PBLC+B) between d -21 and d 37 and compared with cows receiving a commercial monensin bolus (MON) at d -21 and control (CON) cows without either supplement. Data are means with SEM of 17 cows in the CON group, 18 cows in the PBLC+B group and 18 cows in the MON group. Energy-corrected milk yield was calculated by using the formula  $ECM \text{ (kg/d)} = \text{milk yield (kg/d)} \times [0.038 \times \text{fat (g/kg)} + 0.021 \times \text{protein (g/kg)} + 1.05] / 3.28$ . Data were pooled over three consecutive days per animal before statistical analysis by one-way ANOVA at each individual time point. # $P < 0.1$ ;  $a,bP < 0.05$ .
